# Supplementary material for: Optical spectroscopy following the incorporation of a rare-earth containing (Eu) polyoxometalate into a sol-gel derived media
Source: Royal Society of Chemistry journal article supplement (doi:10.1039/b711555e), 2007-01-01
Supplement: b711555e.pdf [file b711555e.pdf]

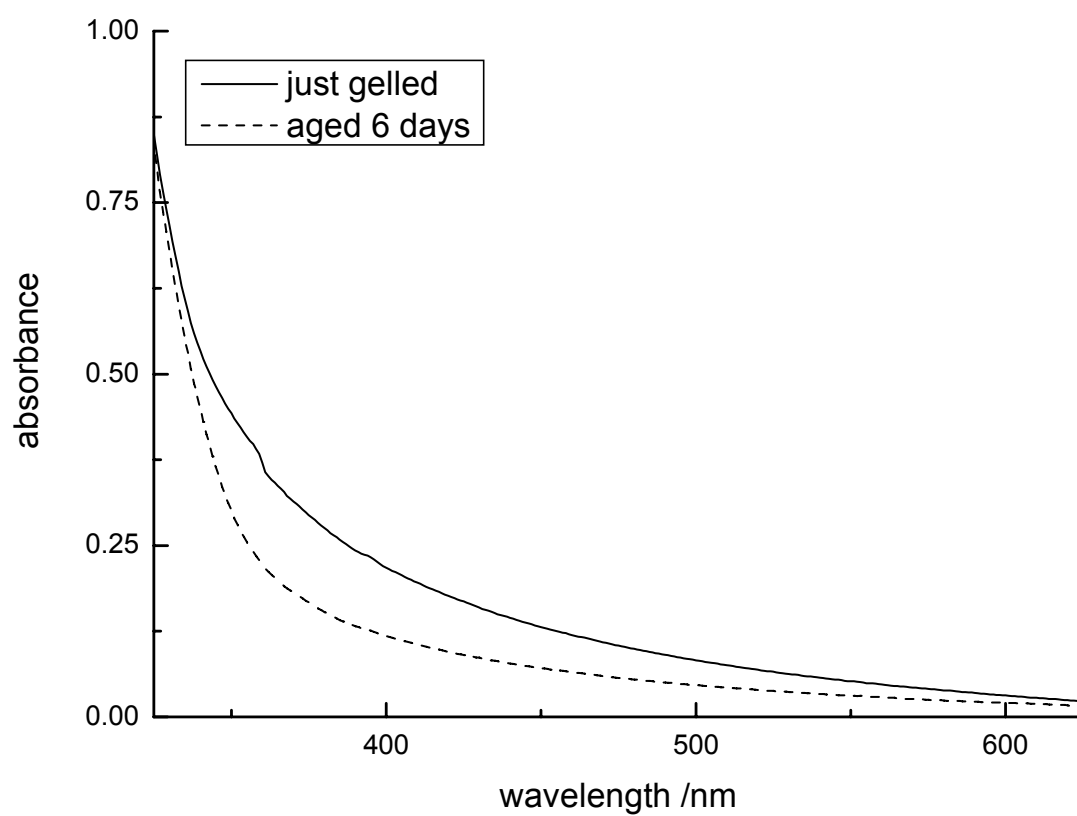

Supplementary figure S1. Absorption spectrum for Eu POM in a sol-gel derived matrix with aging time.
